# Supplementary material
Source: PubMed Central journal article supplement (PMC3020782)

## Supplemental Data

**Supplemental Figure 1. Memantine prevented A $\beta$ -induced 17 kDa tau generation in a dose-dependent manner in mature hippocampal neurons.** Immunoblot analysis of 17 kDa tau production in whole cell lysates prepared from mature hippocampal neurons cultured in the presence (+) or absence (-) of A $\beta$  peptide (20  $\mu$ M) after their preincubation with memantine (1-10  $\mu$ M) using a tau antibody (clone tau5). Decreased in full-length tau immunoreactivity and a strong 17 kDa tau fragment immunoreactive band were detected in A $\beta$ -treated lysates obtained from neurons preincubated with lower doses of memantine. A $\beta$ -induced tau cleavage was prevented when neurons were pretreated with 10  $\mu$ M memantine.

**Supplemental Figure 2. Ifenprodil significantly attenuated A $\beta$ -induced 17 kDa tau generation, calpain activation, and Ca<sup>2+</sup> influx in hippocampal mature neurons.** (A) Immunoblot analysis of 17 kDa tau production and calpain activity, by means of spectrin degradation, in whole cell lysates prepared from mature hippocampal cultures incubated with or without A $\beta$  (20  $\mu$ M), Ifenprodil (5  $\mu$ M), or both. The 17 kDa tau fragment and calpain activation were greatly reduced in A $\beta$ -treated lysates that were preincubated with Ifenprodil as compared to those treated with A $\beta$  alone. (B) Quantification of the 17 kDa/full-length tau ratio as well as the 150/240 kDa spectrin ratio in whole cell lysates treated as described in (A). Tubulin was used as an internal control and the values were expressed as a percent of A $\beta$ -treated neurons. (C) Using fura-2 imaging, intracellular Ca<sup>2+</sup> levels were calculated in live mature neurons treated as mentioned in (A) after their baseline levels had been established. Ca<sup>2+</sup> influx induced by A $\beta$  treatment was significantly decreased in cells that were pretreated with Ifenprodil. Values represent the mean  $\pm$  S.E.M from 5 independent experiments per condition. \*Differs from A $\beta$ -treated cells (B) or untreated controls (C),  $p < 0.01$ . C: control, A $\beta$ : beta-amyloid, I: Ifenprodil.

**Supplemental Figure 3. Synapses number was significantly increased in cholesterol-enriched young hippocampal neurons.** (A-H) Young (A, B, E, F) and mature (C, D, G, H) neurons were incubated with (B, F, D, H) or without (A, C, E, G) cholesterol-modifying drugs. These cells were then immunolabeled with a tubulin (A-D) or synaptophysin (E-H) antibody. (I-J) Quantification of the number of synaptophysin-positive puncta per cell in young (I) and mature (J) cells treated as described in (A-H). Values represent the mean  $\pm$  S.E.M. for 5 independent experiments per condition (n=90 cells/condition). Note the increase in synaptophysin labeling of cholesterol-enriched young neurons as compared to young neuron controls. \*Differs from age-matched control,  $p < 0.05$ . Scale bar: 50  $\mu$ m. C: control, CH: cholesterol-treated, MBCD: MBCD-treated.

Supplemental Figure 1

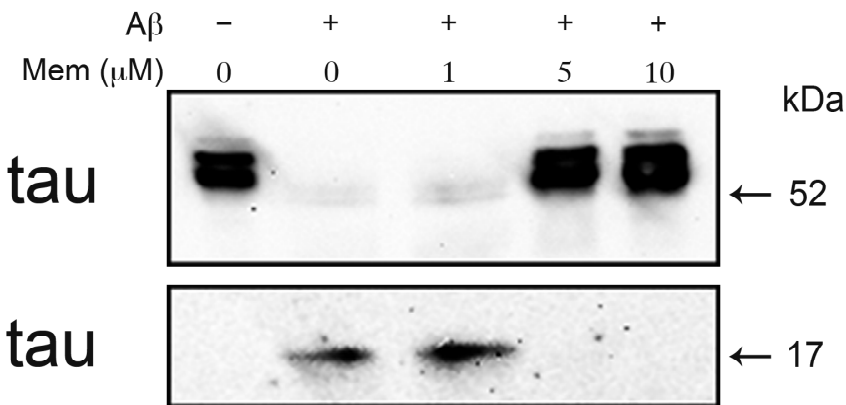

Supplemental Figure 2

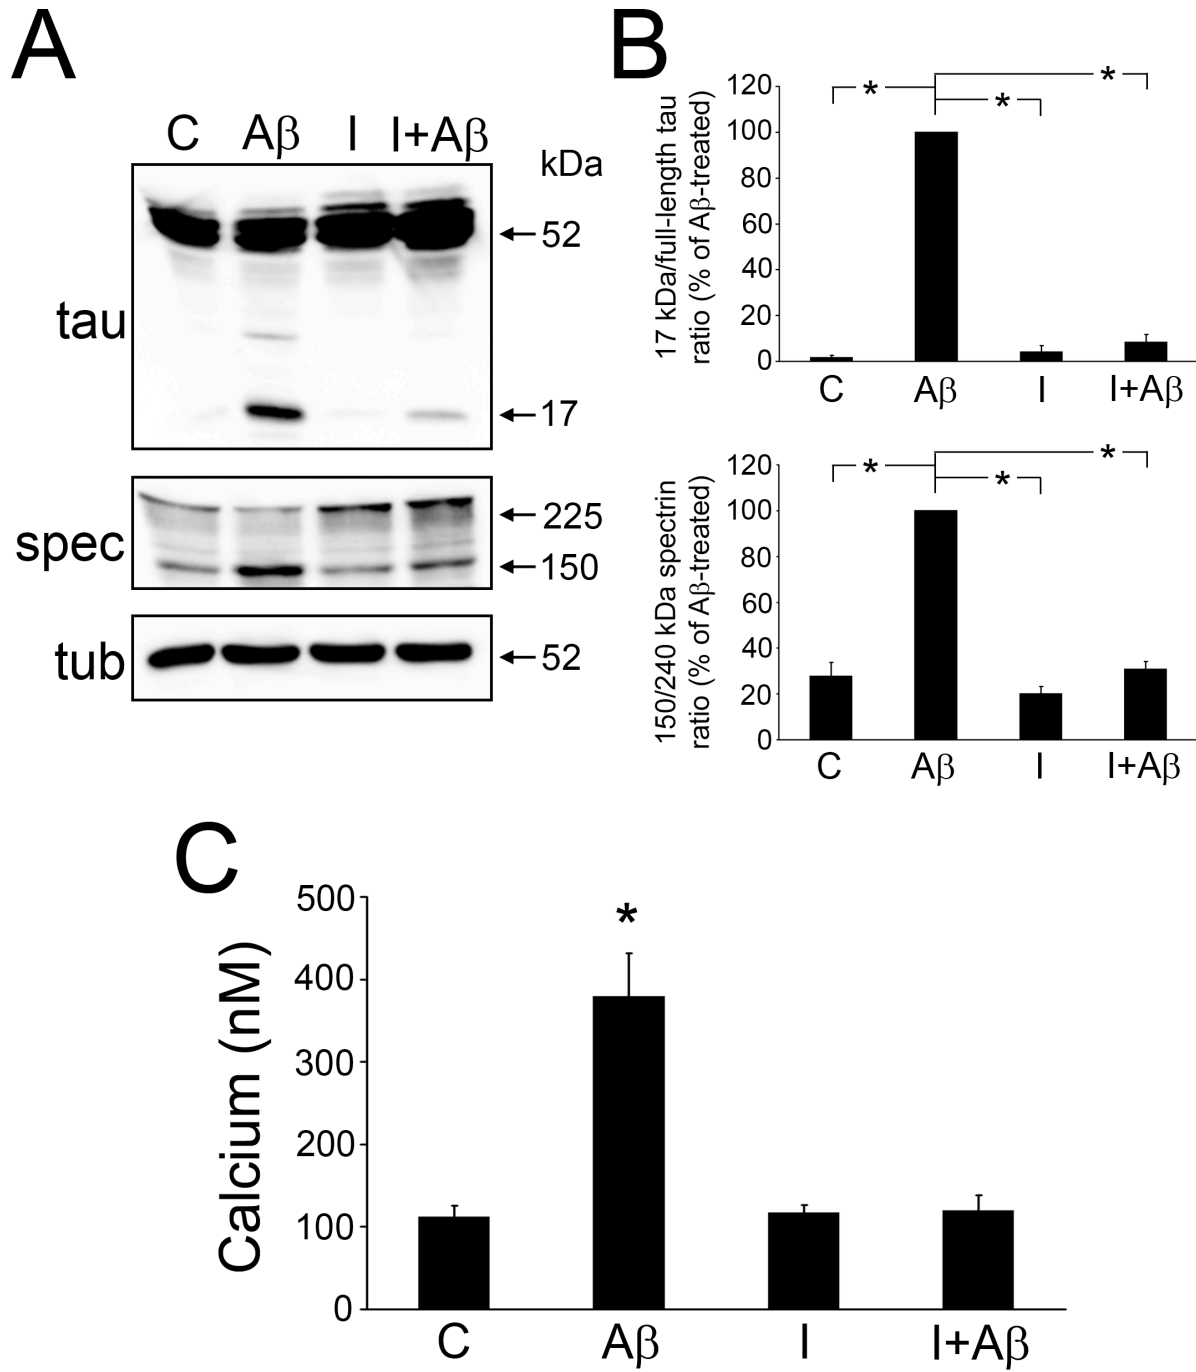

Supplemental Figure 3

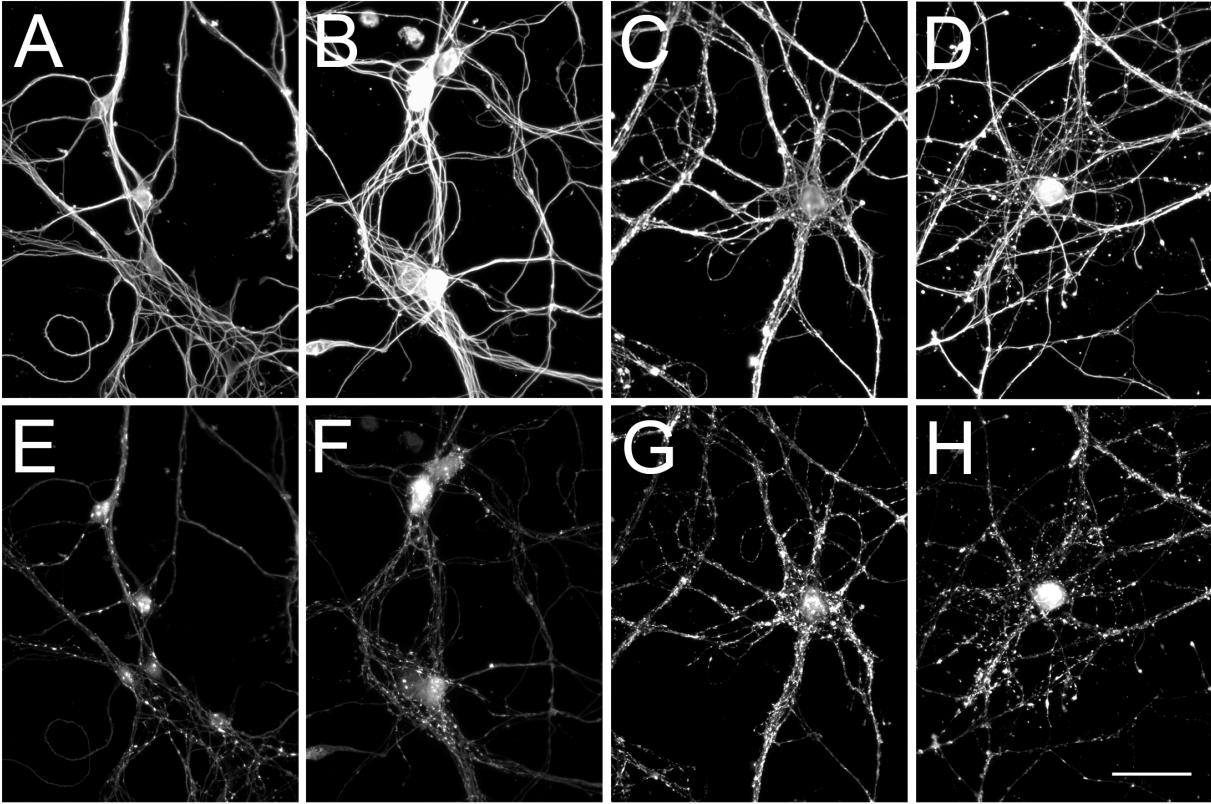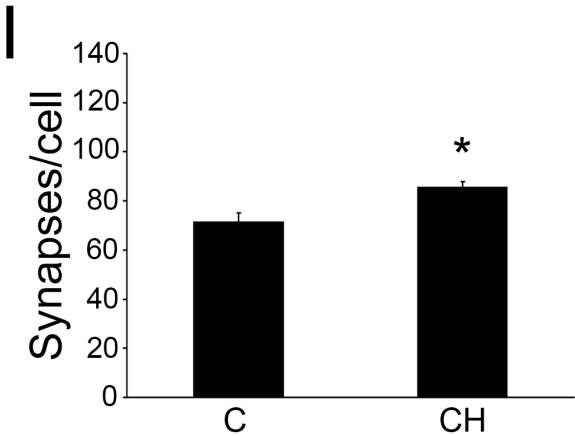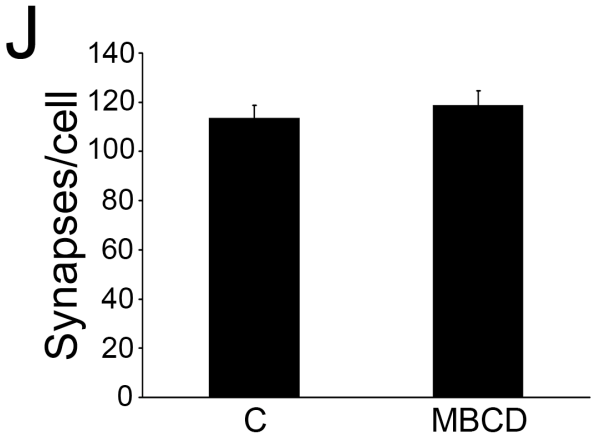

Supplement: supp_M110.154138_jbc.M110.154138-1.pdf [file supp_M110.154138_jbc.M110.154138-1.pdf]
